# Supplementary material for: Natural allelic variation of the AZI1 gene controls root growth under zinc-limiting condition
Source: PubMed Central journal article supplement (PMC5897037; doi:10.1371/journal.pgen.1007304), 2018-04-02
Supplement: pgen.1007304.s007.pdf [file pgen.1007304.s007.pdf]

Table S7. Transcript levels of defence-related genes in wild-type plants grown in presence and/or absence of zinc and azelaic acid.

| Accession | Treatments <sup>x</sup> |         |                                          |                          |                          |
|-----------|-------------------------|---------|------------------------------------------|--------------------------|--------------------------|
|           | Gene Id                 | +Zn-AzA | +Zn+AzA                                  | -Zn-AzA                  | -Zn+AzA                  |
| Col_0     | <b>At1g12470</b>        | 1       | 0,70 <sup>y, **</sup> ±0,10 <sup>z</sup> | 1,76 <sup>**</sup> ±0,14 | 2,96 <sup>**</sup> ±0,35 |
|           | <b>At2g18210</b>        | 1       | 1,24 <sup>**</sup> ±0,03                 | 0,73 <sup>*</sup> ±0,31  | 2,68 <sup>**</sup> ±0,24 |
|           | <b>At5g60890</b>        | 1       | 0,84 <sup>*</sup> ±0,09                  | 1,39 <sup>**</sup> ±0,10 | 0,37 <sup>**</sup> ±0,03 |
|           | <b>At1g76850</b>        | 1       | 1,56 <sup>**</sup> ±0,32                 | 0,40 <sup>**</sup> ±0,02 | 0,90±0,16                |
|           | <b>At3g12580</b>        | 1       | 0,86 <sup>*</sup> ±0,18                  | 0,36 <sup>**</sup> ±0,18 | 1,71 <sup>**</sup> ±0,21 |
|           | <b>At2g31890</b>        | 1       | 1,37 <sup>**</sup> ±0,01                 | 0,40 <sup>**</sup> ±0,11 | 0,86 <sup>**</sup> ±0,07 |
|           | <b>At1g74710</b>        | 1       | 2,45 <sup>**</sup> ±0,04                 | 0,99 <sup>*</sup> ±0,12  | 1,81 <sup>**</sup> ±0,14 |
|           | <b>At1g10585</b>        | 1       | 1,53 <sup>**</sup> ±0,13                 | 1,34 <sup>*</sup> ±0,41  | 1,21 <sup>*</sup> ±0,15  |
|           | <b>At2g37190</b>        | 1       | 0,82 <sup>**</sup> ±0,07                 | 0,60 <sup>**</sup> ±0,29 | 1,10 <sup>*</sup> ±0,38  |
|           | <b>At5g54250</b>        | 1       | 2,43 <sup>**</sup> ±0,27                 | 1,00±0,09                | 0,62 <sup>**</sup> ±0,10 |
|           | <b>At1g14980</b>        | 1       | 0,55 <sup>**</sup> ±0,22                 | 0,69 <sup>**</sup> ±0,50 | 1,13 <sup>*</sup> ±0,05  |
|           | <b>At5g66760</b>        | 1       | 0,94±0,28                                | 0,24 <sup>**</sup> ±0,13 | 0,96±0,05                |
|           | <b>At3g54840</b>        | 1       | 1,62 <sup>**</sup> ±0,16                 | 0,47 <sup>**</sup> ±0,23 | 0,94±0,11                |
|           | <b>At1g09070</b>        | 1       | 2,92 <sup>**</sup> ±0,39                 | 0,48 <sup>**</sup> ±0,21 | 0,83±0,47                |
|           | <b>At5g24150</b>        | 1       | 0,77 <sup>**</sup> ±0,16                 | 1,33±0,82                | 1,04±0,52                |
|           | <b>At5g47230</b>        | 1       | 3,55 <sup>**</sup> ±0,39                 | 0,16 <sup>**</sup> ±0,15 | 1,87 <sup>*</sup> ±0,04  |
|           | <b>At4g04210</b>        | 1       | 0,64 <sup>**</sup> ±0,25                 | 0,21 <sup>**</sup> ±0,03 | 0,92±0,11                |
|           | <b>At5g20030</b>        | 1       | 3,10 <sup>**</sup> ±0,03                 | 0,54 <sup>**</sup> ±0,31 | 3,07 <sup>**</sup> ±0,53 |
|           | <b>At1g27730</b>        | 1       | 1,64 <sup>**</sup> ±0,05                 | 0,77 <sup>**</sup> ±0,07 | 2,97 <sup>**</sup> ±0,04 |
|           | <b>At4g18170</b>        | 1       | 3,48 <sup>**</sup> ±0,15                 | 1,06±0,12                | 2,61 <sup>**</sup> ±0,11 |
|           | <b>At2g46400</b>        | 1       | 2,19 <sup>**</sup> ±0,05                 | 0,66 <sup>**</sup> ±0,06 | 1,63 <sup>**</sup> ±0,06 |
|           | <b>At2g14610</b>        | 1       | 1,84 <sup>**</sup> ±0,04                 | 1,06±0,01                | 0,96±0,07                |
|           | <b>At2g32270</b>        | 1       | 1,20±0,27                                | 2,94 <sup>**</sup> ±0,65 | 1,34 <sup>**</sup> ±0,07 |
|           | <b>At1g05300</b>        | 1       | 1,60 <sup>**</sup> ±0,18                 | 2,53 <sup>**</sup> ±0,51 | 1,58 <sup>**</sup> ±0,22 |
|           | <b>At5g62160</b>        | 1       | 1,10±0,13                                | 2,83 <sup>**</sup> ±0,55 | 1,36 <sup>**</sup> ±0,26 |
|           | <b>At1g14040</b>        | 1       | 1,92 <sup>**</sup> ±0,09                 | 1,78 <sup>**</sup> ±0,01 | 1,42 <sup>**</sup> ±0,35 |
| Sq-1      | <b>At4g12470</b>        | 1       | 0,98±0,18                                | 0,82 <sup>*</sup> ±0,12  | 1,06±0,18                |
|           | <b>At4g18170</b>        | 1       | 1,35 <sup>*</sup> ±0,33                  | 1,30 <sup>*</sup> ±0,41  | 0,80 <sup>*</sup> ±0,08  |
|           | <b>At2g46400</b>        | 1       | 1,32 <sup>*</sup> ±0,24                  | 1,04±0,13                | 1,16±0,09                |
|           | <b>At1g74710</b>        | 1       | 1,13±0,22                                | 1,26 <sup>*</sup> ±0,18  | 0,82±0,32                |
|           | <b>At2g14610</b>        | 1       | 1,13±0,35                                | 1,38 <sup>*</sup> ±0,19  | 0,85±0,29                |

<sup>x</sup>The treatments are described in “Materials and Methods.”

<sup>y</sup>The  $2^{-\Delta\Delta C_t}$  value expresses the mRNA abundance for the gene of interest in a different conditions relative to the average mRNA abundance for the same gene measured in the control treatment. A  $2^{-\Delta\Delta C_t}$  value of 2 means that the mRNA is two times more abundant in plants submitted to the considered treatment than in control plants.

<sup>d</sup>Average ± sd ( $n \geq 4$ ).

\*  $p < 0.05$ , \*\*  $p < 0.01$ .
