# Supplementary material for: Natural allelic variation of the AZI1 gene controls root growth under zinc-limiting condition
Source: PubMed Central journal article supplement (PMC5897037; doi:10.1371/journal.pgen.1007304), 2018-04-02

A

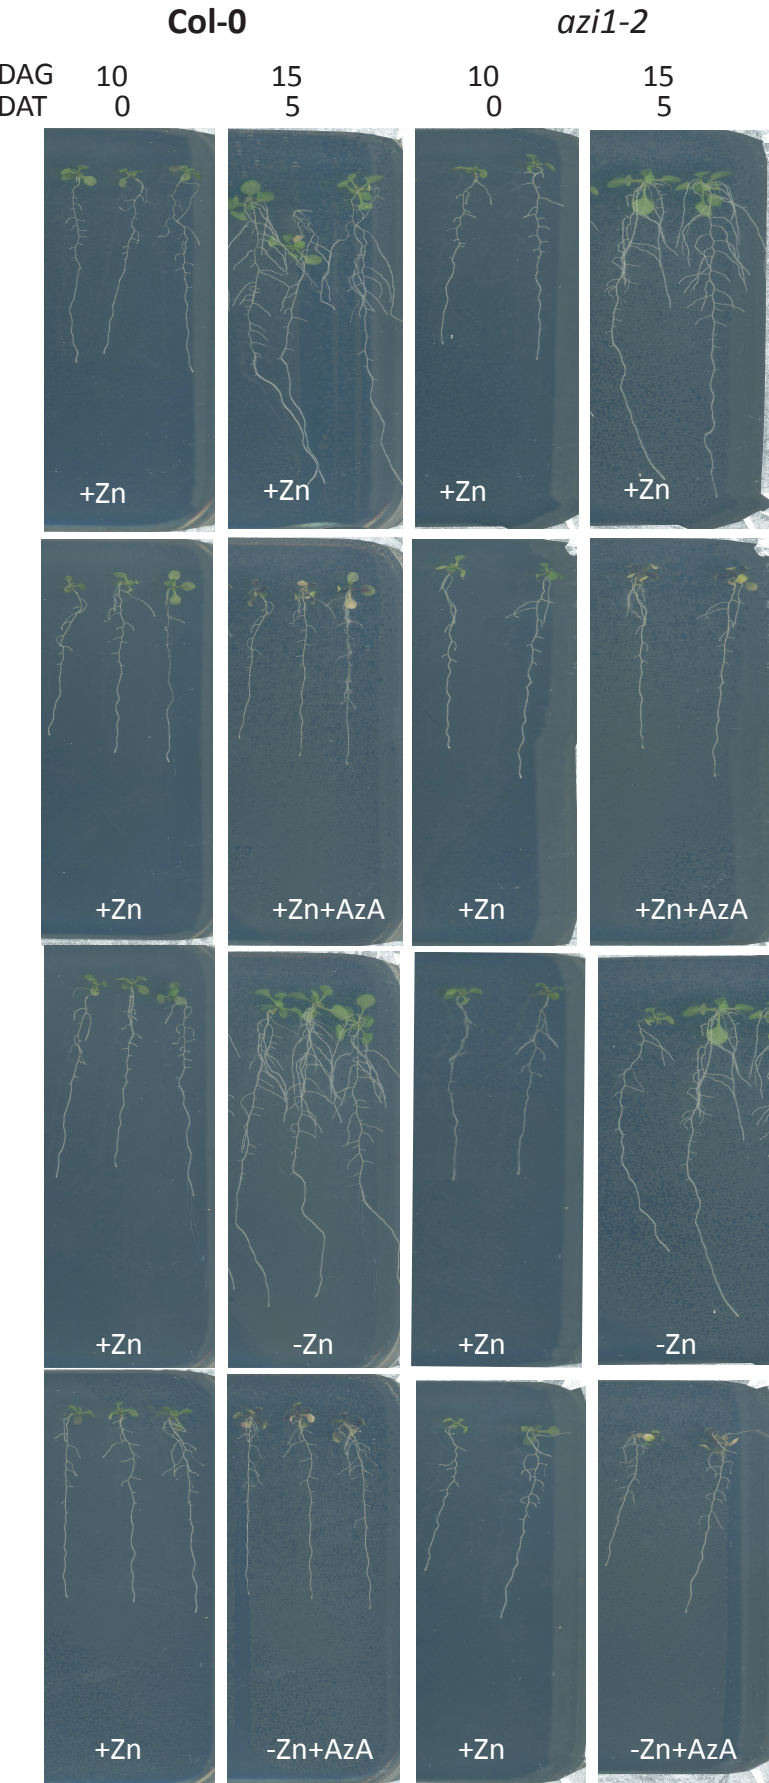

B

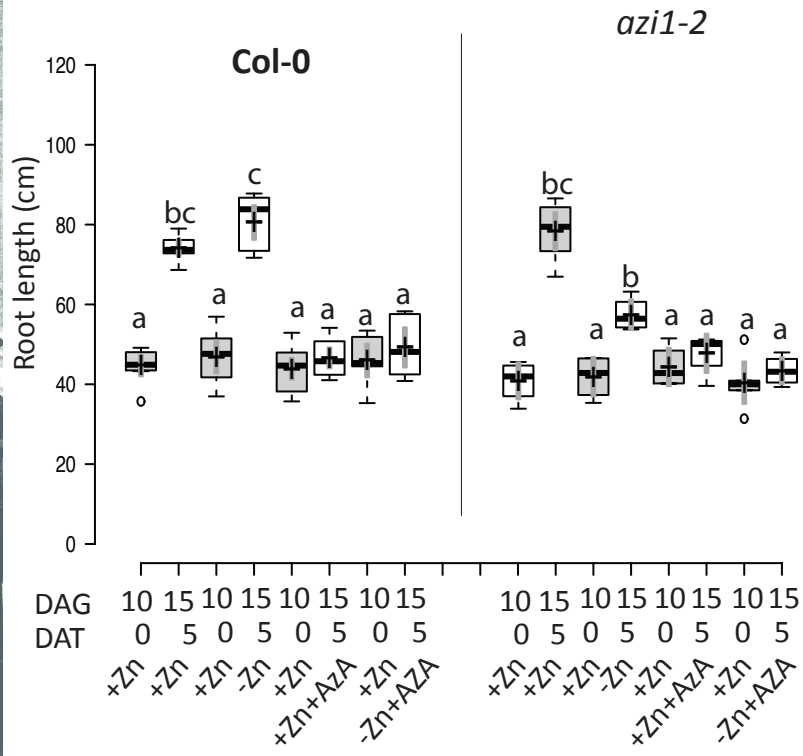

Supplement: pgen.1007304.s021.pdf [file pgen.1007304.s021.pdf]
